# Supplementary material for: Selenization of NiMn-layered double hydroxide with enhanced electrocatalytic activity for oxygen evolution
Source: Royal Society of Chemistry journal article supplement (doi:10.1039/c8dt01372a), 2018-01-01
Supplement: c8dt01372a1.pdf [file c8dt01372a1.pdf]

Supporting information

# Selenization of NiMn layered double hydroxide with enhanced electrocatalytic activity for oxygen evolution

Jing Du,<sup>\*ab</sup> Zehua Zou,<sup>a</sup> Ailing Yu,<sup>a</sup> and Cailing Xu<sup>a</sup>

<sup>a</sup>State Key Laboratory of Applied Organic Chemistry, Laboratory of Special Function Materials and Structure Design of the Ministry of Education, College of Chemistry and Chemical Engineering, Lanzhou University, Lanzhou 730000, China

<sup>b</sup>Key Laboratory of Advanced Energy Materials Chemistry (Ministry of Education), Nankai University, Tianjin 300071, China

\*Corresponding author. E-mail: dujing@lzu.edu.cn

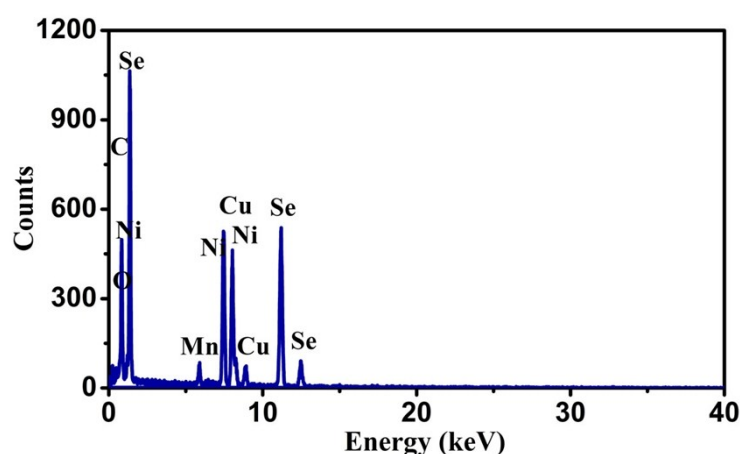

Fig. S1 The energy dispersive X-ray spectrum obtained from the selected square in the TEM image.

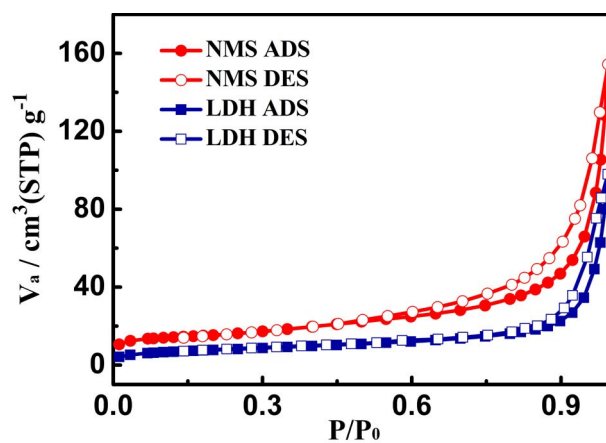

Fig. S2  $\text{N}_2$  adsorption and desorption curves of NiMn LDH and the selenization of NiMn

LDH.

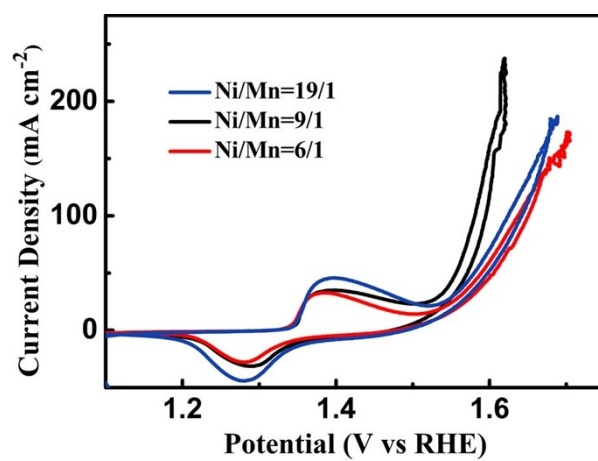

Fig. S3 The cyclic voltammetry (CV) curves of the catalysts with different Ni/Mn ratio.

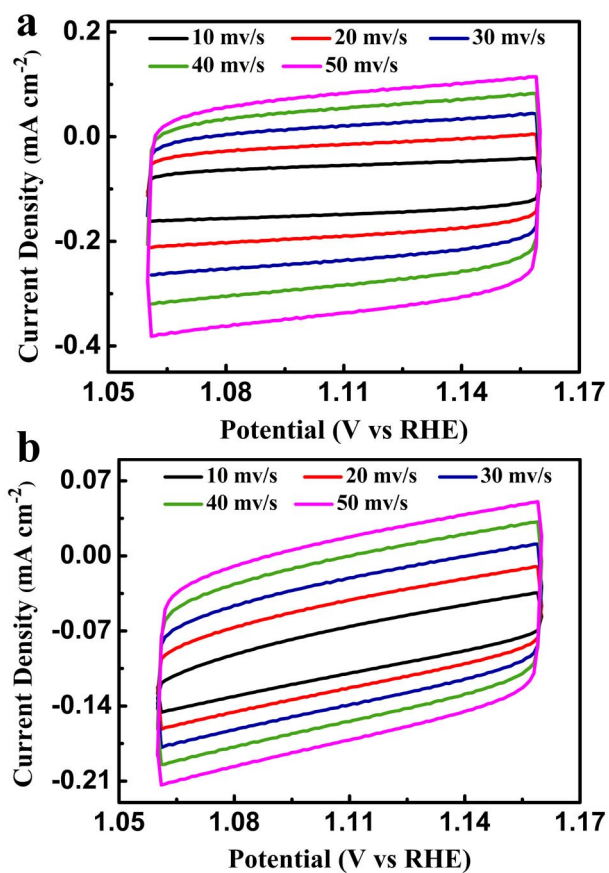

Fig. S4 Electrochemical double-layer capacitance measurements. The cyclic voltammograms (CVs) measurements with various scan rates for (a) NMS and (b) NiMn LDH in 1.0 M KOH.

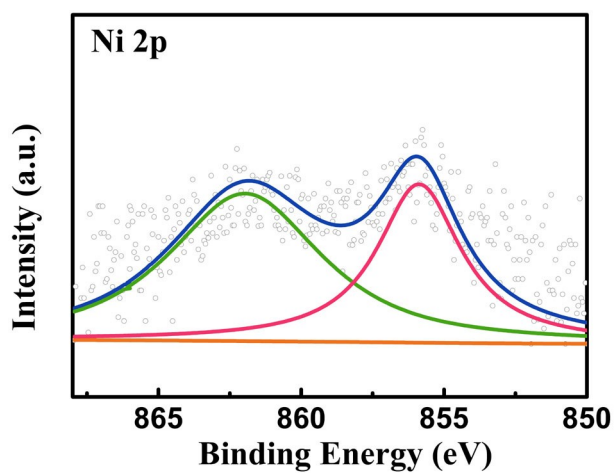

Fig. S5 Ni 2p spectra of NMS sample after OER measurements.

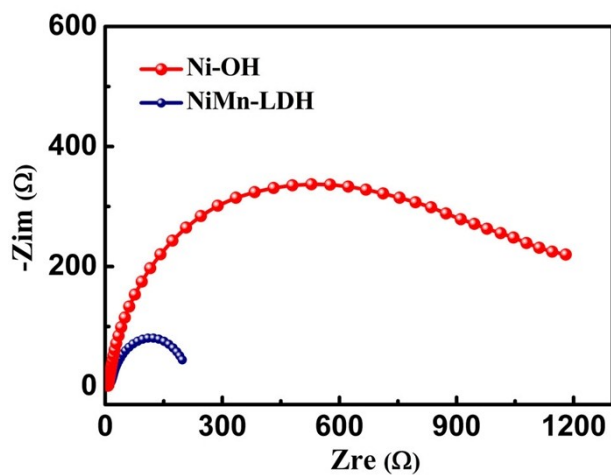

Fig. S6 Nyquist plots of Ni(OH)<sub>2</sub> and NiMnLDH.

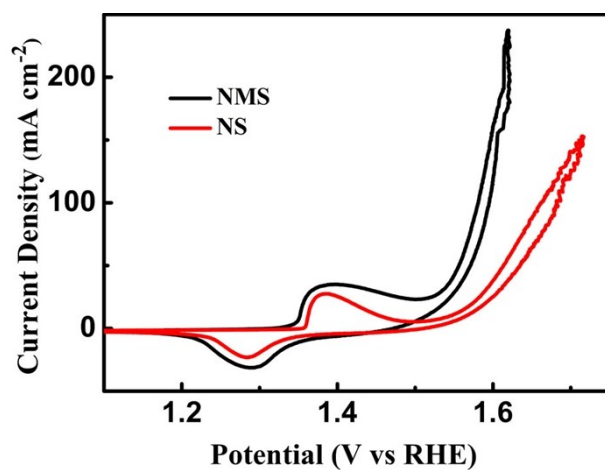

Fig. S7 CV curves of selenized NiMn LDH (NMS) and selenized Ni(OH)<sub>2</sub> (NS) in 1.0 M KOH at a potential sweep rate of 5 mV/s.

Table S1. Comparison of the OER activity of the NMS to that of nickel-based catalysts

coated on glassy carbon reported in the literature.

| Catalysts                                     | Electrolyte    | $J_{\text{geo}}$ (current density<br>in $\text{mA cm}^{-2}$ @<br>overpotential in mV) | Tafel slope<br>( $\text{mV dec}^{-1}$ ) | Substrate | Reference        |
|-----------------------------------------------|----------------|---------------------------------------------------------------------------------------|-----------------------------------------|-----------|------------------|
| $\text{Ni}_{1.12}\text{Fe}_{0.49}\text{Se}_2$ | 1 M KOH        | 10@ $\eta=227$                                                                        | 37.9                                    | GC        | 33               |
| $\text{Ni}_3\text{FeN/N-G}$                   | 1 M KOH        | 10@ $\eta=250$                                                                        | 45                                      | GC        | 34               |
| <b>NMS</b>                                    | <b>1 M KOH</b> | <b>10@<math>\eta=280</math></b>                                                       | <b>71</b>                               | <b>GC</b> | <b>This work</b> |
| $\text{Ni}_2\text{P@C/G}$                     | 1 M KOH        | 10@ $\eta=285$                                                                        | 44                                      | GC        | 35               |
| $\text{CoNi}_2\text{Se}_4$                    | 1 M KOH        | 10@ $\eta=300$                                                                        | 53                                      | GC        | 18               |
| $\text{Ni}_3\text{N/NC}$                      | 1 M KOH        | 10@ $\eta=310$                                                                        | /                                       | GC        | 36               |
| $\text{rGO@CoNiO}_x$                          | 1 M KOH        | 10@ $\eta=320$                                                                        | 45                                      | GC        | 37               |
| $\text{CoNi}_{0.37}\text{-CN}$                | 1 M KOH        | 10@ $\eta=320$                                                                        | 71                                      | GC        | 38               |
| $\text{Ni}_{0.9}\text{Fe}_{0.1}\text{PS}_3$   | 1 M KOH        | 20@ $\eta=329$                                                                        | 69                                      | GC        | 39               |
| NiMn-LDH                                      | 1 M KOH        | 10@ $\eta=350$                                                                        | 40                                      | GC        | 15               |
| $\text{Ni/Mo}_2\text{C-PC}$                   | 1 M KOH        | 10@ $\eta=368$                                                                        | /                                       | GC        | 40               |
